# Supplementary material for: Chitosan Increases Lysine Content through Amino Acid Transporters in Flammulina filiformis
Source: MDPI journal article supplement (doi:10.3390/foods11142163), 2022-07-21
Supplement: s1 [file s1]

**Table S1**

| Primer     | Sequence (5'to 3')          | Description                  |
|------------|-----------------------------|------------------------------|
| RT-18S-F   | CTCGCTTTCCGTGTCCCTA         | Detects the 18S expression   |
| RT-18S-R   | CATGGCAGCCTTGATCTCC         |                              |
| RT-AAT1-F  | TACTGCTGGAACCGAACT          | Detects the AAT1 expression  |
| RT-AAT1-R  | ATGATTGTGAGGGATGTGA         |                              |
| RT-AAT2-F  | GACGCTTGTCGGTAT             | Detects the AAT2 expression  |
| RT-AAT2-R  | GTGCTTTGCCCTCC              |                              |
| RT-AAT3-F  | GTTTCATCGTGGCGGTATTCT       | Detects the AAT3 expression  |
| RT-AAT3-R  | GCCCTCACAAACCTCGTCTT        |                              |
| RT-AAT4-F  | GAAGACAACCTCGCAAAGG         | Detects the AAT4 expression  |
| RT-AAT4-R  | GCATAGAACCGAAGATAGG         |                              |
| RT-AAT5-F  | GGTCTTGCCCTCCATCTGT         | Detects the AAT5 expression  |
| RT-AAT5-R  | CACCTTCTGCGTTTGCTC          |                              |
| RT-AAT6-F  | AAGACGAGCCACATACCA          | Detects the AAT6 expression  |
| RT-AAT6-R  | TCCAGACCCGAGAAATAG          |                              |
| RT-AAT7-F  | CTTGGTTTCTGGGCTGTG          | Detects the AAT7 expression  |
| RT-AAT7-R  | CATTGGATGCGATGAGGA          |                              |
| RT-AAT8-F  | TTTTGGAAATGAGCACCC          | Detects the AAT8 expression  |
| RT-AAT8-R  | AAGTTGTTAGGCGATAGAAT        |                              |
| RT-AAT9-F  | ATACTGACTTCGGTCCTCT         | Detects the AAT9 expression  |
| RT-AAT9-R  | GACACTGACACTGCTGGT          |                              |
| RT-AAT10-F | GAAATGGTCACCTGGATA          | Detects the AAT10 expression |
| RT-AAT10-R | GAGGATGGCAAGAAAGA           |                              |
| RT-AAT11-F | GGGTATCACAGTTGGCTAT         | Detects the AAT11 expression |
| RT-AAT11-R | CGAACGGGAAGGAAGT            |                              |
| AAT3i-F    | ACTGGGTACCTTATCGGGACAGGC    | Detects the AAT3 expression  |
| AAT3i-R    | ACTGACTAGTCAAGATGATGAGACCAA |                              |
| AAT4i-F    | ACTGGGTACCTTATTGCTCGGTTATG  | Detects the AAT4 expression  |
| AAT4i-R    | ACTGACTAGTCAAATGGACCTGGAT   |                              |



**Table S2 Coding genes and protein characteristics of 11 members of the amino acid transporter family of *F. filiformis***

| ID    | Genome sequence number | Gene length (bp) | cDNA length (bp) | The number of amino acid residues | Theoretical Isoelectric Point | Molecular weight (kD) |
|-------|------------------------|------------------|------------------|-----------------------------------|-------------------------------|-----------------------|
| AAT1  | Fv5446                 | 2551             | 1767             | 588                               | 7.90                          | 61.28                 |
| AAT2  | Fv7531                 | 6122             | 5796             | 1931                              | 6.47                          | 211.60                |
| AAT3  | Fv2661                 | 2023             | 1614             | 537                               | 9.16                          | 58.59                 |
| AAT4  | Fv2311                 | 3056             | 2467             | 822                               | 9.74                          | 90.81                 |
| AAT5  | Fv5457                 | 1930             | 1623             | 540                               | 8.06                          | 59.33                 |
| AAT6  | Fv1945                 | 2234             | 1740             | 579                               | 6.67                          | 63.45                 |
| AAT7  | Fv2958                 | 2081             | 1665             | 554                               | 7.11                          | 59.89                 |
| AAT8  | Fv7212                 | 2193             | 1614             | 537                               | 8.24                          | 58.03                 |
| AAT9  | Fv181                  | 2762             | 2634             | 877                               | 8.39                          | 97.83                 |
| AAT10 | Fv894                  | 1949             | 1524             | 507                               | 9.34                          | 56.22                 |
| AAT11 | Fv8268                 | 1326             | 732              | 243                               | 6.81                          | 26.46                 |
